# Severity of dental caries in New York City children receiving school-based prevention and the role of SARS-Cov-2: Results from the Caried*Away* pragmatic trial

Ryan Richard Ruff, MPH, PhD<sup>1 2</sup>, Tamarinda Barry-Godín, MPH, DDS<sup>1</sup>, Rachel Whittlemore, MPH<sup>1</sup>, Topaz Murray Small, MPA<sup>1</sup>, Nydia Santiago-Galvin, RN, MPH<sup>1</sup>, and Priyanka Sharma, RDH<sup>1</sup>

<sup>1</sup>*New York University College of Dentistry*

<sup>2</sup>*New York University School of Global Public Health*

April 2022

## Abstract

*Background:* Children with dental caries (tooth decay), the world's most prevalent noncommunicative disease, face severe negative impacts on health and quality of life. *Methods:* The Caried*Away* trial is a study of the non-inferiority of WHO-sponsored essential medicines when used in a pragmatic, school-based caries prevention model. We present data on severity of disease, evidence of traditional dental care, and the impacts of the COVID-19 pandemic on urgent needs of low-income, minority children in New York City. *Results:* Of the 1398 children enrolled in Caried*Away*, approximately 30% had untreated caries on any dentition at baseline and only 11% of children presented with evidence of having received preventive dental sealants. When follow-up observations were performed after 24 months, 4% of children had developed fistula and nearly 10% presented with pulpal involvement. *Conclusion:* School-based caries prevention programs are attractive public health interventions to overcome access barriers to dental care and reduce oral health inequities. We show that there are severe unmet needs in minority urban children that are further exacerbated by a lack of access to care during disease outbreaks. School-based programs using essential medicines can provide lasting care during pandemic periods.

## 1 Introduction

Coined the “silent epidemic” [1], the World Health organization classifies untreated dental caries (tooth decay) as the most common noncommunicative

disease in the world [2]. Children with untreated caries can experience systemic infection [3], lower quality of life [4], and reduced academic performance and school attendance [5].

Poor oral health is a considerable problem in New York City school children. Data from the Statewide Planning and Research Cooperative System (SPARCS) indicates that the 2017-2019 caries hospital outpatient rate in New York City children aged 3-5 years was 146 per 10,000, however the New York State Community Health Indicator Report (CHIRS) notes that this may be an underestimate. According to CHIRS, approximately 60% of NYC children enrolled in Medicaid and Child Health Plus had at least one dental visit in 2019 [6]. However, using a representative sample of schools, the New York State Oral Health Survey of 3rd Grade Children reported that caries experience and untreated caries in children was 54% and 33%, respectively, and rates were much higher for low-income children (60% and 41%). The prevalence of dental sealants was similarly lowest in low-income children (18%), compared to high-income ones (41%) [7]. While this data indicates an obvious disparity in oral health and unmet needs in high-risk, vulnerable populations, the most recent survey was conducted from 2009-2011.

Within New York City, a network of comprehensive school-based health centers (SBHCs) provide primary and preventive care including health assessments and diagnosis and treatment of minor, acute and chronic medical conditions. NYC school-based dental providers (SBHC-D) offer services ranging from examinations, dental education, and referrals to x-rays, nonsurgical preventive therapies, and extractions. As of 2021, 163 SBHCs were in operation serving approximately 121,000 students, with the stated goals being to “improve the delivery of primary and preventive healthcare services by ensuring that they are accessible, coordinated, comprehensive, collaborative and skilled for all children and youth, including those with special health care needs; (2) providing school-based primary and preventive health care to medically underserved youth through community partnerships with healthcare providers and schools; and (3) facilitate learning and improved school attendance” [8].

The *CariedAway* program is a longitudinal, cluster-randomized, pragmatic trial of minimally invasive, nonrestorative treatments provided using a school-based health center model, and is one of the authorized SBHC-D operators in New York City. A specific focus of *CariedAway* was to provide care to low-income, minority children in primary schools. Children participating in the *CariedAway* program received a full visual-tactile screening and corresponding treatment for the arrest and prevention of dental caries by licensed clinicians. In this paper, we report on the severity of caries and unmet needs in this study population.

## 2 Methods

The *CariedAway* trial was designed to test the non-inferiority of silver diamine fluoride and fluoride varnish compared to glass ionomer sealants/attraumatic

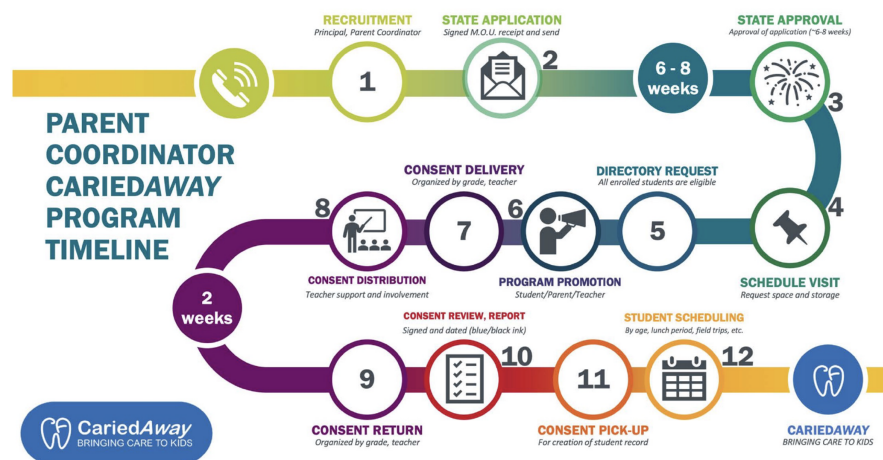

Figure 1: Recruitment and enrollment procedure for CariedAway

restorations and fluoride varnish in the longitudinal arrest and prevention of dental caries. Secondary outcomes included oral health-related quality of life, the role of school nurses in dental care, and the impacts on academic performance. A cluster randomized trial, schools were randomly allocated to receive each intervention. CariedAway was specifically conducted in schools to assess interventions in a pragmatic setting. The trial is registered at [www.clinicaltrials.gov](http://www.clinicaltrials.gov) (#NCT03442309), received IRB approval from the New York School of Medicine Institutional Review Board (#i17-00578), and has a published study protocol [9].

## 2.1 Inclusion and Exclusion Criteria

Any primary schools in New York City with a student population consisting of at least 50% Hispanic/Latino or black ethnicities and at least 80% receiving free or reduced lunch were eligible to participate. The latter criteria was used as a proxy for low socio-economic status. Schools were further ineligible if they had a preexisting SBHC-D operating within the school. All students in enrolled schools were eligible for the study if they provided parental informed consent and child assent. Figure 1 summarizes the recruitment and enrollment process for CariedAway.

## 2.2 Diagnosis and Treatment

Specific protocols for dental screening, assessment, and treatment were created for the CariedAway manual of procedures. Full description of these protocols are included as supplementary appendices. Briefly, all participants received a full visual-tactile dental screening or assessment using standardized dental hygienists or registered nurses while under the supervision of a licensed pediatric

dentist. Caries were diagnosed using the International Caries Detection and Assessment System (ICDAS) adapted criteria in epidemiology and clinical research [10]. Clinicians wore headlamps and used portable dental chairs.

Participants in the experimental arm received fluoride varnish (5% NaF, Colgate PreviDent) on all teeth and a 38% application of silver diamine fluoride (Elevate Oral Care Advantage Arrest 38%, 2.24 F-ion mg/dose) for asymptomatic cavitated lesions of the posterior dentition. Participants in the active comparator received an identical application of fluoride varnish as well as glass ionomer sealants (GC Fuji IX, GC America) to the pits and fissures of bicuspids and molars, and ART on any asymptomatic cavitated lesions.

Table 1: Sample demographics and descriptives (N=1398)

|                 | Overall |        |
|-----------------|---------|--------|
|                 | N/Mean  | % / SD |
| Subjects        | 1398    | 100    |
| Female          | 753     | 53.86  |
| Race            |         |        |
| Hispanic        | 679     | 48.85  |
| Black           | 208     | 14.96  |
| White           | 29      | 2.09   |
| Asian           | 24      | 1.73   |
| Multiple        | 20      | 1.44   |
| Other           | 11      | 0.79   |
| DK/Missing      | 419     | 30.14  |
| Age at baseline | 6.63    | 1.21   |

### 2.3 Study Phases

The *CariedAway* study was conducted in multiple phases due to the impact of the SARS-CoV-2 pandemic. Phase 1 consisted of enrollment and first follow-up for the analytic sample for primary study outcomes, coinciding with the pandemic (baseline enrollment from September 2019 to March 2020 and follow-up observations from September 2021 to March 2022). Phase 2 includes the longitudinal follow-up of the phase 1 sample scheduled through June 2023.

Phase 1 consisted of 4718 subjects enrolled and randomized to each group, and follow-up observations were completed in 1398 subjects (Figure 1). During transition from Phase 1 to Phase 2, newly enrolled subjects were seen for their baseline visit immediately after school COVID restrictions were lifted.

### 2.4 Statistical Analysis

We generated descriptive statistics (means, standard deviations, percents) for the analytic sample for participant demographics, caries and disease severity,

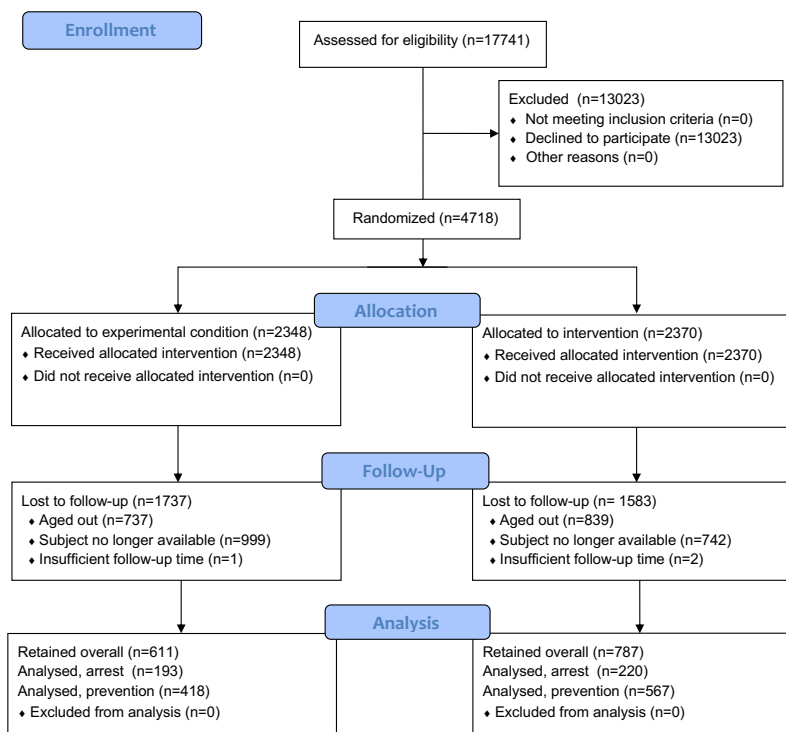

Figure 2: Study flow diagram for the CariedAway randomized controlled trial

evidence of outside dental care (both treatment and prevention), and pathology at first follow-up. Analysis was stratified where appropriate by age and race/ethnicity. Oral health variables were calculated and reported separately (permanent dentition, primary dentition, and occlusal first molars where appropriate) and for caries experience (including cavities and restorations), untreated carious teeth and tooth surfaces, fissure sealants, and the decayed/missing/filled index for whole teeth and tooth surfaces.

Differences across sociodemographic groups for disease severity and evidence of preventive care at baseline were evaluated using logistic regression. Statistical significance was set at  $p < .05$ . Analysis was conducted using R v1.4.

Table 2: Baseline disease severity (N=1398)

|                             | N    | % (total) | % (variable) |
|-----------------------------|------|-----------|--------------|
| Untreated decay, overall    | 413  | 29.54     |              |
| Decay, occlusal first molar | 26   | 1.86      |              |
| Decay, deciduous            | 401  | 28.68     |              |
| Decay, permanent            | 30   | 2.15      |              |
| Total decayed teeth         |      |           |              |
| 0                           | 985  | 70.46     |              |
| 1-2                         | 269  | 19.24     |              |
| 3-5                         | 121  | 8.66      |              |
| 6-8                         | 22   | 1.57      |              |
| More than 8                 | 1    | 0.07      |              |
| Decay by age                |      |           |              |
| 5                           | 78   | 18.89     | 0.25         |
| 6                           | 106  | 25.67     | 0.31         |
| 7                           | 102  | 24.70     | 0.29         |
| 8                           | 103  | 24.94     | 0.33         |
| 9                           | 23   | 5.57      | 0.31         |
| 10                          | 1    | 0.24      | 0.50         |
| Decay by race/ethnicity     |      |           |              |
| Hispanic                    | 183  | 44.31     | 0.27         |
| Black                       | 67   | 16.22     | 0.32         |
| White                       | 10   | 2.42      | 0.34         |
| Asian                       | 8    | 1.94      | 0.33         |
| Other                       | 7    | 1.69      | 0.18         |
| Unreported                  | 138  | 33.41     | 0.32         |
|                             | X    | SD        |              |
| DMFT                        | 0.54 | 0.3       |              |
| DMFS                        | 0.79 | 0.49      |              |
| dmft                        | 1.24 | 2.04      |              |
| dmfs                        | 3.42 | 6.43      |              |

### 3 Results

Sample demographics and descriptive statistics for Phase 1 of *Caried Away* (Table 1) show that approximately 54% of the sample was female and 64% were of either black or Hispanic/Latino race/ethnicity. The average age at baseline was 6.63 years (SD=29.54).

For disease severity (Table 2), the overall prevalence of untreated caries was 29.5%, predominantly found in the primary dentition. Approximately 19% had untreated caries on 1 or 2 teeth, 9% 3-5 teeth, and 23 subjects had decay on six or more. When stratified by race/ethnicity, decay was consistent, ranging from 27% in Hispanic/Latino participants to 34% in whites. Across the entire sample, the average number of decayed, missing, or filled primary teeth was 1.24 (SD=2.04) and surfaces (dmfs) was 3.42 (SD=6.43). Untreated caries prevalence by school indicates that the range of decay (minimum of 10 participants per school) was 8% to 48% (supplementary table S1).

Table 3: Baseline evidence of prior dental treatment and prevention (N=1398)

|                    | N   | %     |
|--------------------|-----|-------|
| Treated dentition  | 374 | 26.75 |
| Sealant prevalence | 156 | 11.16 |
| Filling prevalence | 288 | 20.6  |
| Sealant by race    |     |       |
| Hispanic           | 83  | 0.12  |
| Black              | 15  | 0.07  |
| White              | 4   | 0.14  |
| Asian              | 2   | 0.08  |
| Other              | 2   | 0.06  |
| Unreported         | 50  | 0.12  |

Approximately 27% of subjects presented at baseline with evidence of treated dentition (Table 3), showing they had previously seen a dentist for care. However the baseline sealant prevalence, indicating prior preventive care, was only 11%. Filling prevalence, in contrast, was 20%. Stratified by race, sealant prevalence was lowest in black (7%) and Asian (8%) children, compared to 12% in Hispanics/Latinos and 14% in whites.

Logistic regression results for baseline disease and unmet needs (Table 4) indicate that there were no differences in untreated decay prevalence by race/ethnicity or sex. The odds of decay slightly increased with age (OR = 1.11, 95% CI = 1.01, 1.22). Age also was significantly associated with sealant prevalence (OR = 1.85, 95% CI = 1.59, 2.15). Black children presented with 46% reduced odds of having sealants compared to Hispanics (OR = 0.54, 95% CI = 0.30, 0.96) but no other group was significant.

Pathology for the analytic sample at first-follow up (Table 5) shows that over 12% of subjects presented with either new fistula, swelling on any tooth, or

Table 4: Differences in baseline disease severity and unmet needs (N=1398)

|            | Untreated decay |            | Sealant present |            |
|------------|-----------------|------------|-----------------|------------|
|            | OR              | 95% CI     | OR              | 95% CI     |
| Race       |                 |            |                 |            |
| Black      | 1.29            | 0.92, 1.80 | 0.54            | 0.30, 0.96 |
| White      | 1.47            | 0.67, 3.22 | 1.41            | 0.47, 4.27 |
| Asian      | 1.42            | 0.60, 3.39 | 0.79            | 0.18, 3.56 |
| Multiple   | 0.87            | 0.31, 2.44 | 0.35            | 0.44, 2.71 |
| Other      | 0.59            | 0.13, 2.75 | 0.6             | 0.73, 4.85 |
| Unreported | 1.31            | 1.00, 1.70 | 0.98            | 0.67, 1.44 |
| Age        | 1.11            | 1.01, 1.22 | 1.85            | 1.59, 2.15 |
| Females    | 0.89            | 0.71, 1.13 | 1.15            | 0.81, 1.62 |

Table 5: Pathology after twenty-four months (N=1398)

|                                | N   | %     |
|--------------------------------|-----|-------|
| Fistula (any)                  | 61  | 4.36  |
| Fistula (number)               |     |       |
| 1                              | 52  | 3.72  |
| 2                              | 7   | 0.5   |
| 3                              | 2   | 0.14  |
| Pulpal involvement (any)       | 138 | 9.87  |
| Pulpal involvement (number)    |     |       |
| 1                              | 92  | 6.58  |
| 2                              | 30  | 2.15  |
| 3                              | 10  | 0.72  |
| 4                              | 6   | 0.43  |
| Swelling (any)                 | 6   | 0.43  |
| Swelling (number)              |     |       |
| 1                              | 5   | 0.36  |
| 2                              | 1   | 0.07  |
| Total fistula, swelling, or PI | 171 | 12.23 |



pulpal involvement. The most prevalent clinical concern was pulpal involvement (N=138, 10%), followed by fistula (N=61, 4%) and swelling (N=6, less than 1%).

## 4 Discussion

In this paper, we report on the severity of dental decay and unmet needs of low-income, minority children participating in a school-based caries prevention program operating in New York City primary schools. The Centers for Disease Control and Prevention recommends school-based sealant programs as an effective and cost-efficient method to increase access to care for vulnerable, traditionally underserved populations [11, 12, 13]. We previously showed that comprehensive, biannual caries prevention can significantly reduce the risk of longitudinal dental decay [14], and the *CariedAway* trial demonstrated that other minimally invasive, non-restorative treatments are similarly effective as dental sealants, potentially greatly increasing the reach and effectiveness of school-based caries prevention [15].

The observed baseline prevalence preexisting dental care and any untreated decay both indicate a severe unmet need and lack of access to traditional dental services. This corroborates our findings from other states and communities, where untreated dental decay can reach double that of the national average, even in schools that are located in close proximity to community dental clinics [16]. In this prior assessment of students' unmet needs in Massachusetts, approximately one-third of children had untreated caries, and nearly two-thirds had no clinical indication of having received preventive sealants on the permanent dentition, despite the fact that 57% of the children had received prior dental care. Together these results suggest that traditional clinic-based delivery of dental care is insufficient for many at-risk youth.

In addition to less than a third of *CariedAway* participants having any evidence of receiving outside dental treatment, stratification by sealants and fillings suggests that the majority of that care was for treating decay and not preventing disease. This is of further concern in light of our pathology results at follow-up, as the two-year gap in observation between baseline and follow-up coincided with the onset and spread of the SARS-CoV-2 virus. In New York City, all dental offices were closed in June 2020 except for emergency care and all school-based health centers were suspended along with in-school academic services. SBHC/SBHC-Ds were unable to operate from March 2020 through August 2021. Although dental offices were soon authorized to reopen with new infection control policies (e.g., limiting aerosol-generating procedures), it has previously been reported that dental care access during the pandemic was significantly reduced [17]. Additionally, an analysis of the National Survey of Children's Health indicated that, following the pandemic, children were more likely to have poor oral health, higher risk of bleeding gingivae, and lower likelihood of dental visits (specifically preventive visits) [18]. Given the low rate of prior dental care exhibited by *CariedAway* participants pre-pandemic, there are substantial concerns that the unmet needs of New York City minority children

increased in severity during COVID-19.

Actual versus perceived availability of affordable dental health options may further exacerbate oral disease inequities in urban school children. Approximately 4600 dental providers were previously listed in New York that treat children and accept both Medicaid and the Children’s Health Insurance Program. However, prior research indicated that 90% of these providers were located in a small number of counties, and a substantial proportion of listings for providers were invalid [19]. As a result, children from low-income households may not have the support necessary to treat urgent needs, and further investigation into the true accessible care options for these high-risk children is recommended.

Beyond overall effectiveness, school-based caries prevention may be an alternative model for dental care during viral outbreaks. Much of the concern over dental clinics during COVID-19 were due to the potential airborne transmission of the virus and the frequent utilization of aerosol-generating procedures (AGP). While traditional dental sealants are historically AGPs, other minimally invasive techniques such as silver diamine fluoride, as implemented in *CariedAway*, can be used in a non-aerosolized way [20, 21] as part of a proposed Safer Aerosol-Free Emergent Dentistry (SAFER) approach [22]. Proper communication regarding the mitigation of infection in a school-based program can potentially increase access to critical dental care during pandemic periods.

## 5 Additional information

### 5.1 Funding

Research reported in this publication was funded through a Patient-Centered Outcomes Research Institute (PCORI) award (PCS-1609-36824). The content is solely the responsibility of the authors and does not necessarily reflect the official views of the funding organization, New York University, or the NYU College of Dentistry.

### 5.2 Author contributions

RRR was a principal investigator and conceived of and designed the study. TBG served as the supervising dentist, directed clinical activities, and oversaw all data collection. RW, TM, NSG, and PS were involved in the conduct and management of *CariedAway*, including study coordination, enrollment, community engagement, provision of treatments, and data collection. RRR performed all statistical analyses and wrote the manuscript. All authors critically reviewed the manuscript and provided edits. All authors read and approved the final manuscript.

## References

- [1] R. M. Benjamin. Oral health: the silent epidemic. *Public Health Rep*, 125(2):158–159, 2010.
- [2] D. Duangthip and C. H. Chu. Challenges in Oral Hygiene and Oral Health Policy. *Front Oral Health*, 1:575428, 2020.
- [3] M. A. Peres, L. M. D. Macpherson, R. J. Weyant, B. Daly, R. Venturelli, M. R. Mathur, S. Listl, R. K. Celeste, C. C. Guarnizo-Herreño, C. Kearns, H. Benizian, P. Allison, and R. G. Watt. Oral diseases: a global public health challenge. *Lancet*, 394(10194):249–260, Jul 2019.
- [4] N. R. Aimee, A. J. van Wijk, M. Maltz, M. M. Varjao, H. D. Mestrinho, and J. C. Carvalho. Dental caries, fluorosis, oral health determinants, and quality of life in adolescents. *Clin Oral Investig*, 21(5):1811–1820, 2017.
- [5] R. R. Ruff, S. Senthil, S. R. Susser, and A. Tsutsui. Oral health, academic performance, and school absenteeism in children and adolescents: A systematic review and meta-analysis. *J Am Dent Assoc*, 150(2):111–121 e4, 2019.
- [6] Sas stored process web application - [webbi1.health.ny.gov](http://webbi1.health.ny.gov), Feb 2022.
- [7] J. V. Kumar, D. L. Altshul, T. L. Cooke, and E. L. Green. Oral health status of third grade children: New York state oral health surveillance system. Report, New York State Department of Health, 2005.
- [8] School-based health centers in new York state, Jul 2021.
- [9] R. R. Ruff and R. Niederman. Silver diamine fluoride versus therapeutic sealants for the arrest and prevention of dental caries in low-income minority children: study protocol for a cluster randomized controlled trial. *Trials*, 19(1):523, 2018.
- [10] K. Shivakumar, S. Prasad, and G. Chandu. International Caries Detection and Assessment System: A new paradigm in detection of dental caries. *J Conserv Dent*, 12(1):10–16, Jan 2009.
- [11] S. O. Griffin, K. Jones, and M. Crespín. Calculating averted caries attributable to school-based sealant programs with a minimal data set. *J Public Health Dent*, 74(3):202–9, 2014.
- [12] S. O. Griffin, S. Naavaal, C. Scherrer, M. Patel, S. Chattopadhyay, and Force Community Preventive Services Task. Evaluation of school-based dental sealant programs: An updated community guide systematic economic review. *Am J Prev Med*, 52(3):407–415, 2017.

- [13] Barbara F. Gooch, Susan O. Griffin, Shellie Kolavic Gray, William G. Kohn, R. Gary Rozier, Mark Siegal, Margherita Fontana, Diane Brunson, Nancy Carter, David K. Curtis, Kevin J. Donly, Harold Haering, Lawrence F. Hill, H. Pitts Hinson, Jayanth Kumar, Lewis Lampiris, Mark Mallatt, Daniel M. Meyer, Wanda R. Miller, Susan M. Sanzi-Schaedel, Richard Simonsen, Benedict I. Truman, and Domenick T. Zero. Preventing dental caries through school-based sealant programs. *The Journal of the American Dental Association*, 140(11):1356–1365, 2009.
- [14] J. R. Starr, R. R. Ruff, J. Palmisano, J. M. Goodson, O. M. Bukhari, and R. Niederman. Longitudinal caries prevalence in a comprehensive, multicomponent, school-based prevention program. *J Am Dent Assoc*, 152(3):224–233, 03 2021.
- [15] Ryan Richard Ruff, Tamarinda Barry-Godin, and Richard Niederman. Non-inferiority of essential medicines for caries arrest and prevention in a school-based program: Results from the cariedaway pragmatic clinical trial. *medRxiv*, page 2022.04.26.22274321, 2022.
- [16] M. A. Aldosari, O. M. Bukhari, R. R. Ruff, J. N. Palmisano, H. Nguyen, C. W. Douglass, R. Niederman, and J. R. Starr. Comprehensive, School-Based Preventive Dentistry: Program Details and Students’ Unmet Dental Needs. *J Sch Health*, 91(9):761–770, 09 2021.
- [17] M. Moharrami, B. Bohlouli, and M. Amin. Frequency and pattern of outpatient dental visits during the COVID-19 pandemic at hospital and community clinics. *J Am Dent Assoc*, 153(4):354–364, 04 2022.
- [18] W. Lyu and G. L. Wehby. Effects of the COVID-19 pandemic on children’s oral health and oral health care use. *J Am Dent Assoc*, Feb 2022.
- [19] C. H. Chinn, S. Rossy, and E. Best. Analysis of InsureKidsNow.gov dental providers in New York State. *Pediatr Dent*, 35(5):451–455, 2013.
- [20] E. Eden, J. Frencken, S. Gao, J. A. Horst, and N. Innes. Managing dental caries against the backdrop of COVID-19: approaches to reduce aerosol generation. *Br Dent J*, 229(7):411–416, 10 2020.
- [21] R. Singhal, P. Singhal, R. Namdev, and S. Negi. Can silver diamine fluoride be an alternative to aerosol-based dentistry during the COVID scenario? A retrospective analysis. *J Indian Soc Pedod Prev Dent*, 39(3):316–320, 2021.
- [22] H. Benzian and R. Niederman. A Dental Response to the COVID-19 Pandemic-Safer Aerosol-Free Emergent (SAFER) Dentistry. *Front Med (Lausanne)*, 7:520, 2020.
